# Supplementary material for: Influence of the EULAR recommendations for the use of imaging in large vessel vasculitis in the diagnosis of giant cell arteritis: results of the ARTESER register
Source: HighWire-hosted journal article supplement (doi:10.1136/rmdopen-2022-002507), 2022-12-01
Supplement: rmdopen-2022-002507supp002_data_supplement.pdf [file rmdopen-2022-002507supp002_data_supplement.pdf]

| Centre | Diagnosis GCA | Biopsy (+) (n) | Image (+) (n) | Biopsy (-) and image (-) | Cranial symptoms |
|--------|---------------|----------------|---------------|--------------------------|------------------|
| 1      | 70            | 62             | 20            | 8                        | 55               |
| 2      | 68            | 40             | 30            | 27                       | 68               |
| 3      | 86            | 80             | 26            | 6                        | 78               |
| 4      | 78            | 72             | 59            | 6                        | 65               |
| 5      | 66            | 57             | 40            | 9                        | 59               |
| 6      | 60            | 54             | 49            | 6                        | 52               |
| 7      | 44            | 32             | 13            | 12                       | 44               |
| 8      | 58            | 50             | 48            | 8                        | 46               |
| 9      | 50            | 38             | 26            | 12                       | 46               |
| 10     | 73            | 37             | 29            | 36                       | 73               |
| 11     | 32            | 26             | 16            | 6                        | 31               |
| 12     | 80            | 59             | 35            | 21                       | 77               |
| 13     | 100           | 100            | 100           | 0                        | 89               |
| 14     | 62            | 52             | 43            | 10                       | 60               |
| 15     | 67            | 50             | 18            | 17                       | 61               |
| 16     | 48            | 37             | 23            | 11                       | 47               |
| 17     | 33            | 14             | 14            | 19                       | 32               |
| 18     | 132           | 80             | 32            | 52                       | 123              |
| 19     | 91            | 64             | 17            | 27                       | 82               |
| 20     | 37            | 27             | 3             | 10                       | 37               |
| 21     | 25            | 17             | 6             | 7                        | 24               |
| 22     | 36            | 26             | 4             | 10                       | 34               |
| 25     | 74            | 35             | 7             | 39                       | 73               |
| 24     | 75            | 66             | 43            | 9                        | 64               |
| 25     | 40            | 29             | 10            | 11                       | 34               |
| 26     | 90            | 52             | 16            | 38                       | 85               |
